# Supplementary material
Source: publisher site journal article supplement (https://www.degruyterbrill.com/publication/isbn/9783110347012/downloadAsset/9783110347012_Contents.pdf)
Supplement: Supplementary file 1 [file 9783110347012_Contents.pdf]

# Contents

Véronique Lacoste, Jakob Leimgruber and Thiemo Breyer

**Authenticity: A view from inside and outside sociolinguistics — 1**

Nikolas Coupland

**Language, society and authenticity: Themes and perspectives — 14**

## Section 1: Indexing local meanings of authenticity

Penelope Eckert

**The trouble with authenticity — 43**

Lauren Hall-Lew

**Chinese social practice and San Franciscan authenticity — 55**

Lefteris Kailoglou

**Being more alternative and less Brit-pop: The quest for originality in three urban styles in Athens — 78**

Barbara Johnstone

**“100 % Authentic Pittsburgh”: Sociolinguistic authenticity and the linguistics of particularity — 97**

Britta Schneider

**‘Oh boy, ¿hablas español?’ –**

**Salsa and the multiple value of authenticity in late capitalism — 113**

Monica Heller

**The commodification of authenticity — 136**

## Section 2: Indexing authenticity in delocalised settings

Michael Silverstein

**The race from place: Dialect eradication vs. the linguistic “authenticity” of *terroir* — 159**

Graham M. Jones

**Reported Speech as an authentication tactic in computer-mediated communication — 188**

Andrea Moll

**Authenticity in dialect performance?**

A case study of “Cyber-Jamaican” — 209

Theresa Heyd and Christian Mair

**From vernacular to digital ethnolinguistic repertoire: The case of Nigerian Pidgin — 244**

Akinmade T. Akande

**Hybridity as authenticity in Nigerian hip-hop lyrics — 269**

### Section 3:

### **Authenticity construction in other mediatised contexts**

Florian Coulmas

**Authentic writing — 289**

Anna Kristina Hultgren

**Lexical variation at the internationalized university: Are indexicality and authenticity always relevant? — 304**

Martin Gill

**“Real communities”, rhetorical borders: Authenticating British identity in political discourse and on-line debate — 324**

Johanna Sprondel and Tilman Haug

**What’s in a *promesse authentique*? Doubting and confirming authenticity in 17<sup>th</sup>-century French diplomacy — 343**

**Index — 366**
